# Supplementary material for: Nano-formulations for bone-specific delivery of siRNA forCrkIIsilencing-induced regulation of bone formation and resorption to maximize therapeutic potential for bone-related diseases
Source: Royal Society of Chemistry journal article supplement (doi:10.1039/d2bm02038f), 2023-01-01
Supplement: d2bm02038f1.pdf [file d2bm02038f1.pdf]

## Supplementary data

### Nano-formulations for bone-specific delivery of siRNA for CrkII silencing-induced simultaneous regulation of bone formation and resorption to maximize therapeutic potential for bone-related diseases

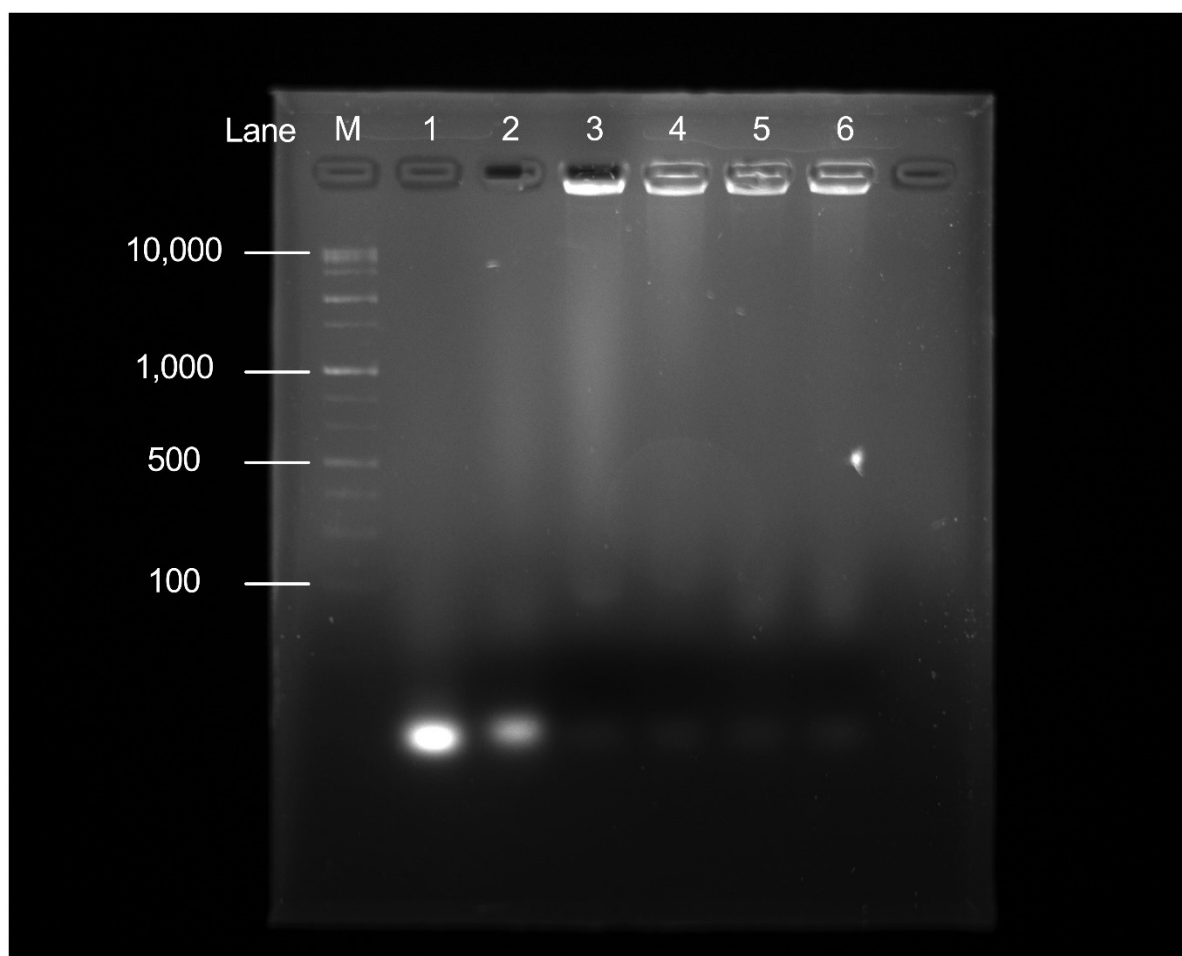

**Supplementary information 1.** Raw images of agarose gel electrophoresis showing migration profile of siRNA and (AspSerSer)<sub>6</sub>-liposomes in Fig. 1C. Lane 1: *siCrkII*, lane 2: negative control siRNA (NC), lane 3: liposome-*siCrkII*, lane 4: liposome-NC, lane 5: (AspSerSer)<sub>6</sub>-liposome-*siCrkII*, lane 6: (AspSerSer)<sub>6</sub>-liposome-NC. M: marker.

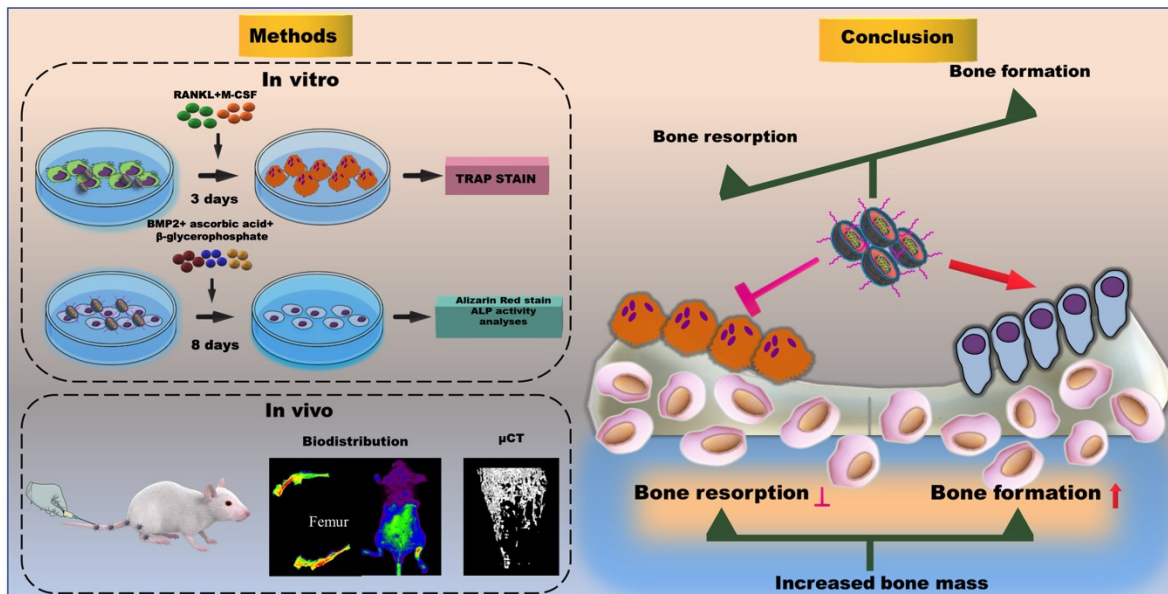

**Supplementary information 2.** Graphical abstract. (AspSerSer)<sub>6</sub>-liposome-siCrkII maintained its gene silencing ability in both osteoclasts and osteoblasts in vitro and significantly reduced osteoclast formation while increased osteoblast differentiation in vitro. Fluorescence image analyses exhibited that (AspSerSer)<sub>6</sub>-liposome-siCrkII was dominantly presented in bone among other tissues even when systemically administrated. Microcomputed-tomography revealed that bone loss induced by RANKL administration was recovered by systemic administration of (AspSerSer)<sub>6</sub>-liposome-siCrkII. Collectively, (AspSerSer)<sub>6</sub>-liposome-siCrkII is a promising therapeutic strategy for the development of treatment for bone diseases, and it overcomes adverse effects derived from ubiquitous expression via bone-specific delivery of siRNA.
